# Supplementary material for: Detection of Trace Amounts of Water in Organic Solvents by DNA-Based Nanomechanical Sensors
Source: MDPI journal article supplement (doi:10.3390/bios12121103), 2022-12-01
Supplement: s1 [file s1]

# Detection of Trace Amounts of Water in Organic Solvents by DNA-Based Nanomechanical Sensors

Tomohiro Murata <sup>1,2</sup>, Kosuke Minami <sup>3,\*</sup>, Tomohiko Yamazaki <sup>4,5</sup>, Genki Yoshikawa <sup>3,6</sup> and Katsuhiko Ariga <sup>1,2,\*</sup>

<sup>1</sup> Graduate School of Frontier Sciences, The University of Tokyo, 5-1-5 Kashiwanoha, Kashiwa, Chiba 277-8561 Japan; t.murata20s@ams.k.u-tokyo.ac.jp

<sup>2</sup> International Center for Materials Nanoarchitectonics (MANA), National Institute for Materials Science (NIMS), 1-1 Namiki, Tsukuba, Ibaraki 305-0044 Japan

<sup>3</sup> Center for Functional Sensor & Actuator (CFSN), Research Center for Functional Materials (RCFM), National Institute for Materials Science (NIMS), 1-1 Namiki, Tsukuba, Ibaraki 305-0044 Japan; yoshikawa.genki@nims.go.jp

<sup>4</sup> Research Center for Functional Materials (RCFM), National Institute for Materials Science (NIMS), 1-2-1 Sengen, Tsukuba, Ibaraki 305-0047 Japan; yamazaki.tomohiko@nims.go.jp

<sup>5</sup> Division of Life Science, Hokkaido University, Kita 10, Nishi 8, Kita-ku, Sapporo 060-0808, Japan

<sup>6</sup> Materials Science and Engineering, Graduate School of Pure and Applied Science, University of Tsukuba, 1-1-1 Tennodai, Tsukuba, Ibaraki 305-8571 Japan

\* Correspondence: minami.kosuke@nims.go.jp (K.M.); ariga.katsuhiko@nims.go.jp (K.A.)

## Supplementary Figures

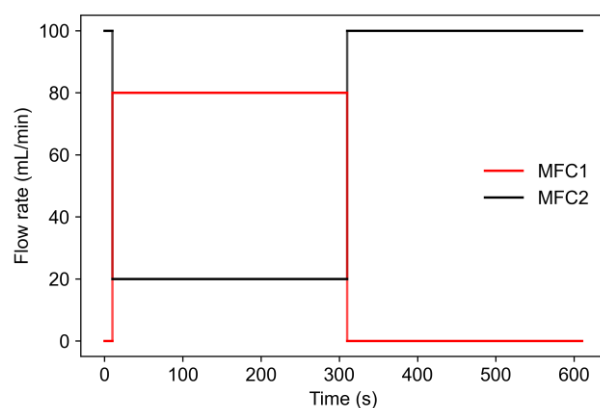

**Figure S1.** Sensing sequence of mass flow controllers (MFCs).

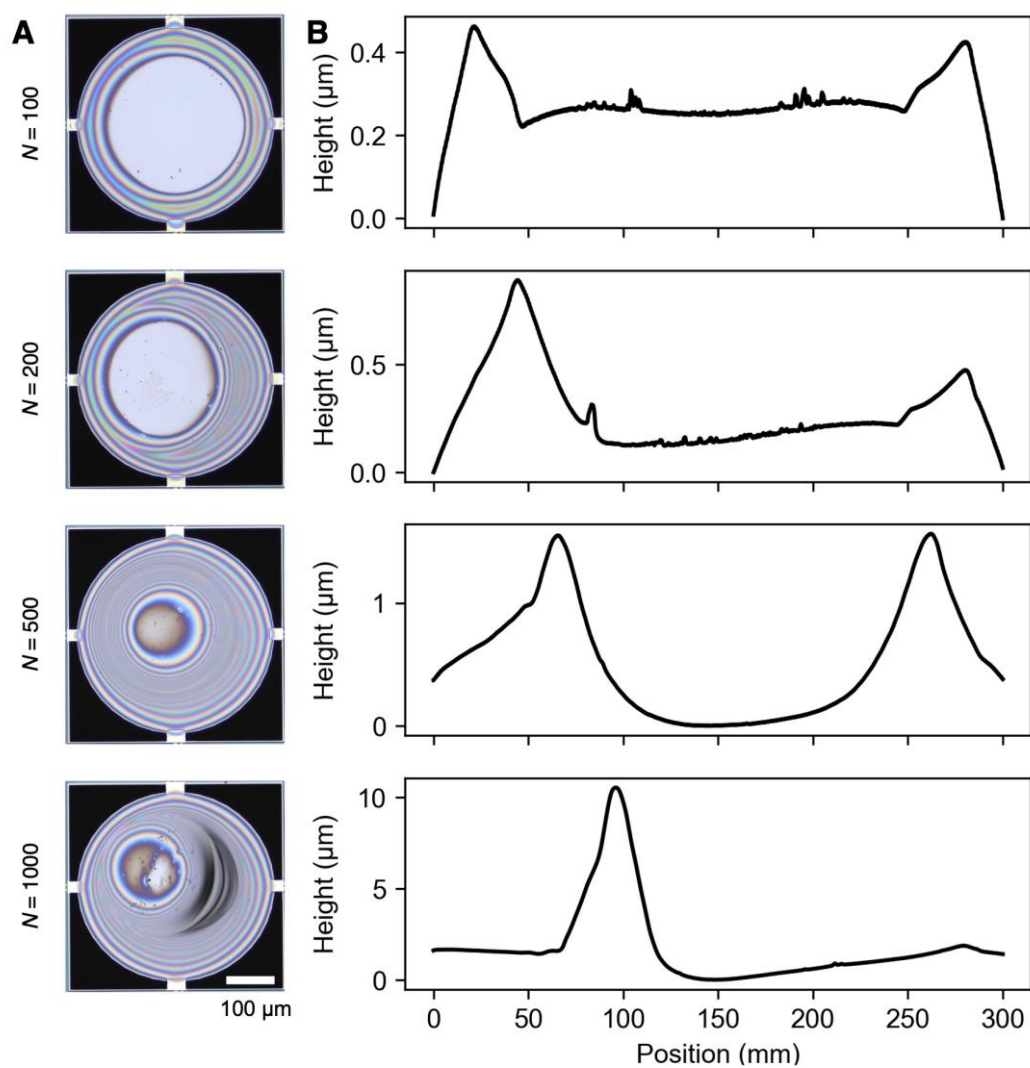

**Figure S2.** Surface profile of the DNA films coated on MSS.

**A,** Optical microscope mages of the DNA films with different number of inkjet drop-lets ( $N$ ). **B,** Surface profile of the DNA films on MSS measured by surface stylus profiler.

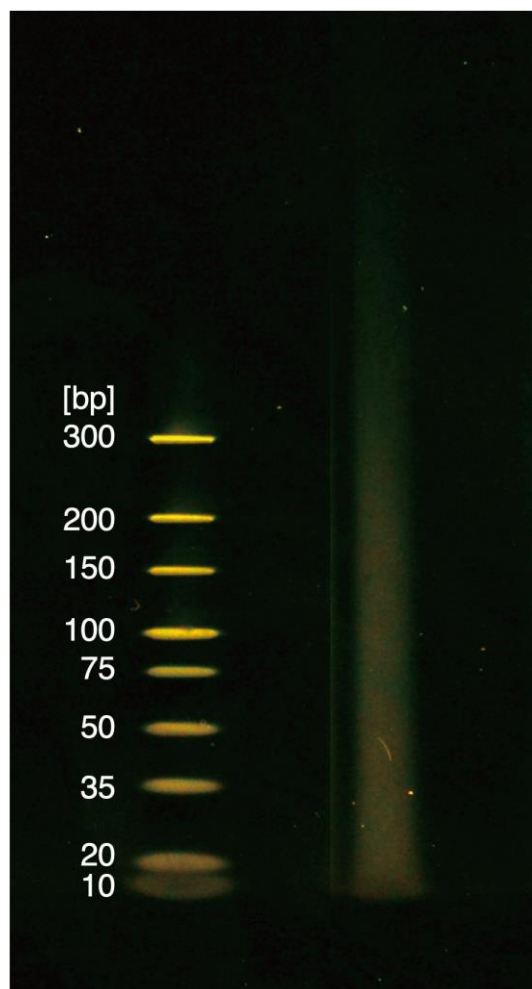

**Figure S3.** Electrophoresis of calf thymus DNA used in this work.

Polyacrylamide gel electrophoresis (e-PAGE) in TG buffer. DNA was stained with SYBR Gold.

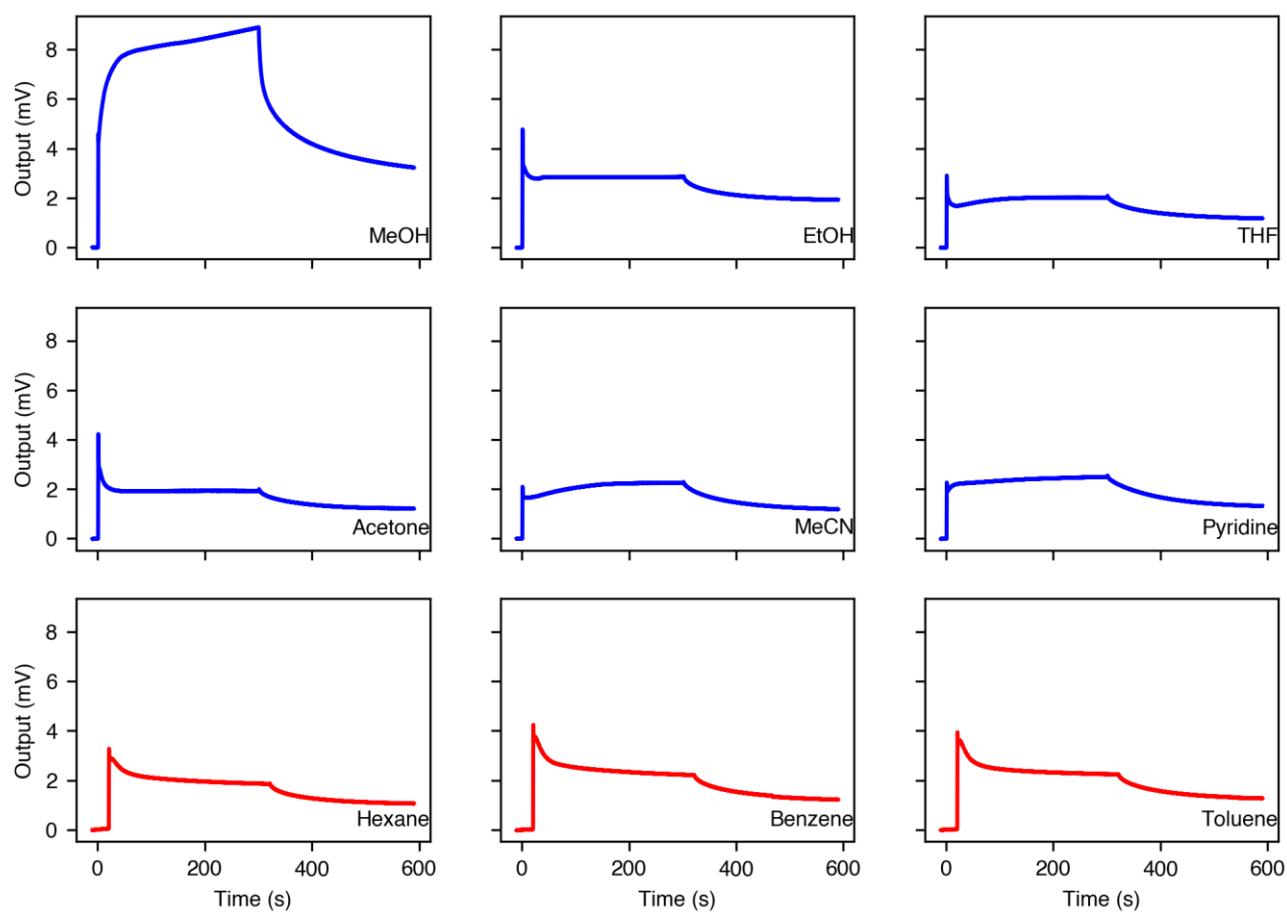

**Figure S4.** Signal responses to various vapors of organic solvents.

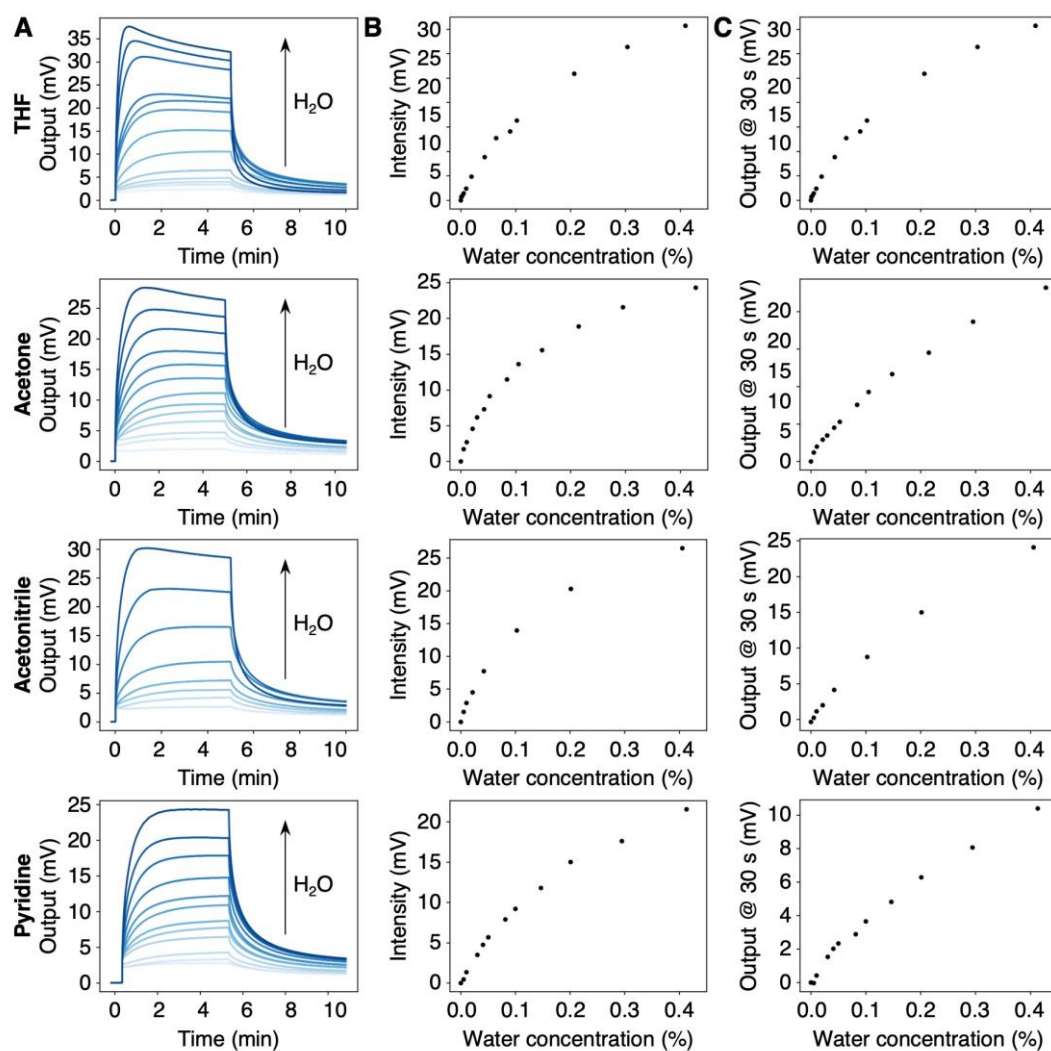

**Figure S5.** Signal responses to trace amount of water in various organic solvents.

**A,** Concentration-dependent signal responses to water in organic solvents: THF, acetone, acetonitrile, and pyridine. **B,C,** Plots of signal intensities (**B**) and output at 30 s after vapor injection (**C**) as a function of water concentration (w/w%).

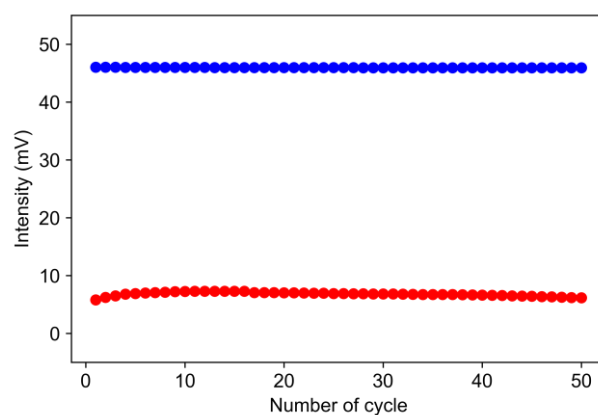

**Figure S6.** Reproducibility of DNA-based MSS.

Plots of signal intensities to water vapor (80%RH, blue) and vapor of water in THF (100 ppm, red).

## Supplementary Table

**Table S1.** Relative sensitivity and Limit of Detection (LoD) of relative humidity sensors reported in literature.

| Device                                                | Receptor material              | LoD [%RH]     | Reference        |
|-------------------------------------------------------|--------------------------------|---------------|------------------|
| Surface acoustic wave resonator (SAW)                 | MWCNT/nafion                   | 0.5           | [1]              |
| Capacitive ultrasonic transducer (CMUT)               | GO                             | 0.4           | [2]              |
| Quartz crystal microbalance (QCM)                     | ZnO nanotetrapods              | 0.3           | [3]              |
| Surface acoustic wave resonator (SAW)                 | GO/PVA/SiO <sub>2</sub>        | 0.25          | [4]              |
| Microcantilever, dynamic mode                         | ZnO-based cantilever           | 0.20          | [5]              |
| Film bulk acoustic wave resonator (FBAR)              | ZnO                            | 0.12          | [6]              |
| Membrane-type surface stress sensor (MSS)             | CAB                            | 0.09          | [7]              |
| Membrane-type surface stress sensor (MSS)             | PEI                            | 0.05          | [8]              |
| Quartz crystal microbalance (QCM)                     | TiO <sub>2</sub> nanoparticles | 0.04          | [9]              |
| Microcantilever, dynamic mode                         | Hydrogel                       | 0.03          | [10]             |
| Membrane-type surface stress sensor (MSS)             | PEI                            | 0.02          | [8]              |
| Microcantilever, dynamic mode                         | PMMA                           | 0.02          | [11]             |
| Membrane-type surface stress sensor (MSS)             | GO                             | 0.019         | [12]             |
| Quartz crystal microbalance (QCM)                     | Cellulose nanocrystal          | 0.015         | [13]             |
| Membrane-type surface stress sensor (MSS)             | PSS                            | 0.008         | [14]             |
| Quartz crystal microbalance (QCM)                     | GO/PEI film                    | 0.0069        | [15]             |
| Microcantilever, dynamic mode                         | CMOS metal                     | 0.005         | [16]             |
| Capacitive micromachined ultrasonic transducer (CMUT) | Mesoporous silica              | 0.0014        | [17]             |
| <b>Membrane-type surface stress sensor (MSS)</b>      |                                | <b>0.0017</b> | <b>This work</b> |

Abbreviations: CAB, cellulose acetate butyrate; GO, graphene oxide; MWCNT, multi-wall carbon nanotube; PEI, poly(ethylene imine); PSS, poly(sodium 4-styrenesulfate); PVA, poly(vinyl alcohol)

**Table S2.** Limit of Detection (LoD) of DNA-based MSS to trace amount of water in organic solvents.

| Solvent      | LoD      |       |
|--------------|----------|-------|
|              | (w/w%)   | (ppb) |
| THF          | 0.000053 | 530   |
| Acetone      | 0.000082 | 820   |
| Acetonitrile | 0.000076 | 760   |
| Pyridine     | 0.000120 | 1200  |

## Supplementary References

- Sheng, L.; Dajing, C.; Yuquan, C., A surface acoustic wave humidity sensor with high sensitivity based on electrospun MWCNT/Nafion nanofiber films. *Nanotechnology* **2011**, *22*, 265504. 10.1088/0957-4484/22/26/265504.
- Sun, C.; Shi, Q.; Yazici, M.S.; Lee, C.; Liu, Y., Development of a Highly Sensitive Humidity Sensor Based on a Piezoelectric Micromachined Ultrasonic Transducer Array Functionalized with Graphene Oxide Thin Film. *Sensors* **2018**, *18*, 10.3390/s18124352.
- Wang, X.-H.; Ding, Y.-F.; Zhang, J.; Zhu, Z.-Q.; You, S.-Z.; Chen, S.-Q.; Zhu, J., Humidity sensitive properties of ZnO nanotetrapods investigated by a quartz crystal microbalance. *Sens. Actuators B: Chem.* **2006**, *115*, 421–427. 10.1016/j.snb.2005.10.005.
- Su, Y.; Li, C.; Li, M.; Li, H.; Xu, S.; Qian, L.; Yang, B., Surface acoustic wave humidity sensor based on three-dimensional architecture graphene/PVA/SiO<sub>2</sub> and its application for respiration monitoring. *Sens. Actuators B: Chem.* **2020**, *308*, 127693. 10.1016/j.snb.2020.127693.
- Mistry, K.; Nguyen, V.H.; Arabi, M.; Ibrahim, K.H.; Asgarimoghaddam, H.; Yavuz, M.; Munoz-Rojas, D.; Abdel-Rahman, E.; Musselman, K.P., Highly Sensitive Self-Actuated Zinc Oxide Resonant Microcantilever Humidity Sensor. *Nano Lett.* **2022**, *22*, 3196–3203. 10.1021/acs.nanolett.1c04378.
- Qiu, X.; Tang, R.; Zhu, J.; Oiler, J.; Yu, C.; Wang, Z.; Yu, H., Experiment and theoretical analysis of relative humidity sensor based on film bulk acoustic-wave resonator. *Sens. Actuators B: Chem.* **2010**, *147*, 381–384. 10.1016/j.snb.2010.04.012.
- Loizeau, F.; Akiyama, T.; Gautsch, S.; Vettiger, P.; Yoshikawa, G.; de Rooij, N., Membrane-Type Surface Stress Sensor with Piezoresistive Readout. *Proc. Eng.* **2012**, *47*, 1085–1088. 10.1016/j.proeng.2012.09.339.
- Yoshikawa, G.; Akiyama, T.; Gautsch, S.; Vettiger, P.; Rohrer, H., Nanomechanical membrane-type surface stress sensor. *Nano Lett.* **2011**, *11*, 1044–1048. 10.1021/nl103901a.
- Addabbo, T.; Fort, A.; Mugnaini, M.; Vignoli, V.; Baldi, A.; Bruzzi, M., Quartz-Crystal Microbalance Gas Sensors Based on TiO<sub>2</sub>Nanoparticles. *IEEE Transactions on Instrumentation and Measurement* **2018**, *67*, 722–730. 10.1109/tim.2017.2785118.

10. Xu, J.; Bertke, M.; Li, X.; Mu, H.; Zhou, H.; Yu, F.; Hamdana, G.; Schmidt, A.; Bremers, H.; Peiner, E., Fabrication of ZnO nanorods and Chitosan@ZnO nanorods on MEMS piezoresistive self-actuating silicon microcantilever for humidity sensing. *Sens. Actuators B: Chem.* **2018**, *273*, 276–287. 10.1016/j.snb.2018.06.017.
11. Karabacak, D.M.; Brongersma, S.H.; Crego-Calama, M., Enhanced sensitivity volatile detection with low power integrated micro-mechanical resonators. *Lab. Chip* **2010**, *10*, 1976–1982. 10.1039/b926170b.
12. Imamura, G.; Minami, K.; Shiba, K.; Mistry, K.; Musselman, K.; Yavuz, M.; Yoshikawa, G.; Saiki, K.; Obata, S., Graphene Oxide as a Sensing Material for Gas Detection Based on Nanomechanical Sensors in the Static Mode. *Chemosensors* **2020**, *8*, 82. 10.3390/chemosensors8030082.
13. Yao, Y.; Huang, X.-h.; Zhang, B.-y.; Zhang, Z.; Hou, D.; Zhou, Z.-k., Facile fabrication of high sensitivity cellulose nanocrystals based QCM humidity sensors with asymmetric electrode structure. *Sens. Actuators B: Chem.* **2020**, *302*. 10.1016/j.snb.2019.127192.
14. Yoshikawa, G.; Akiyama, T.; Loizeau, F.; Shiba, K.; Gautsch, S.; Nakayama, T.; Vettiger, P.; de Rooij, N.F.; Aono, M., Two dimensional array of piezoresistive nanomechanical Membrane-type Surface Stress Sensor (MSS) with improved sensitivity. *Sensors* **2012**, *12*, 15873–15887. 10.3390/s121115873.
15. Yuan, Z.; Tai, H.; Ye, Z.; Liu, C.; Xie, G.; Du, X.; Jiang, Y., Novel highly sensitive QCM humidity sensor with low hysteresis based on graphene oxide (GO)/poly(ethyleneimine) layered film. *Sens. Actuators B: Chem.* **2016**, *234*, 145–154. 10.1016/j.snb.2016.04.070.
16. Verd, J.; Sansa, M.; Uranga, A.; Perez-Murano, F.; Segura, J.; Barniol, N., Metal microelectromechanical oscillator exhibiting ultra-high water vapor resolution. *Lab. Chip* **2011**, *11*, 2670–2672. 10.1039/c1lc20103d.
17. Lee, H.J.; Park, K.K.; Kupnik, M.; Melosh, N.A.; Khuri-Yakub, B.T., Mesoporous thin-film on highly-sensitive resonant chemical sensor for relative humidity and CO<sub>2</sub> detection. *Anal. Chem.* **2012**, *84*, 3063–3066. 10.1021/ac300225c.
